# Supplementary material for: The fitness costs of antibiotic resistance mutations
Source: PubMed Central journal article supplement (PMC4380921; doi:10.1111/eva.12196), 2014-08-27

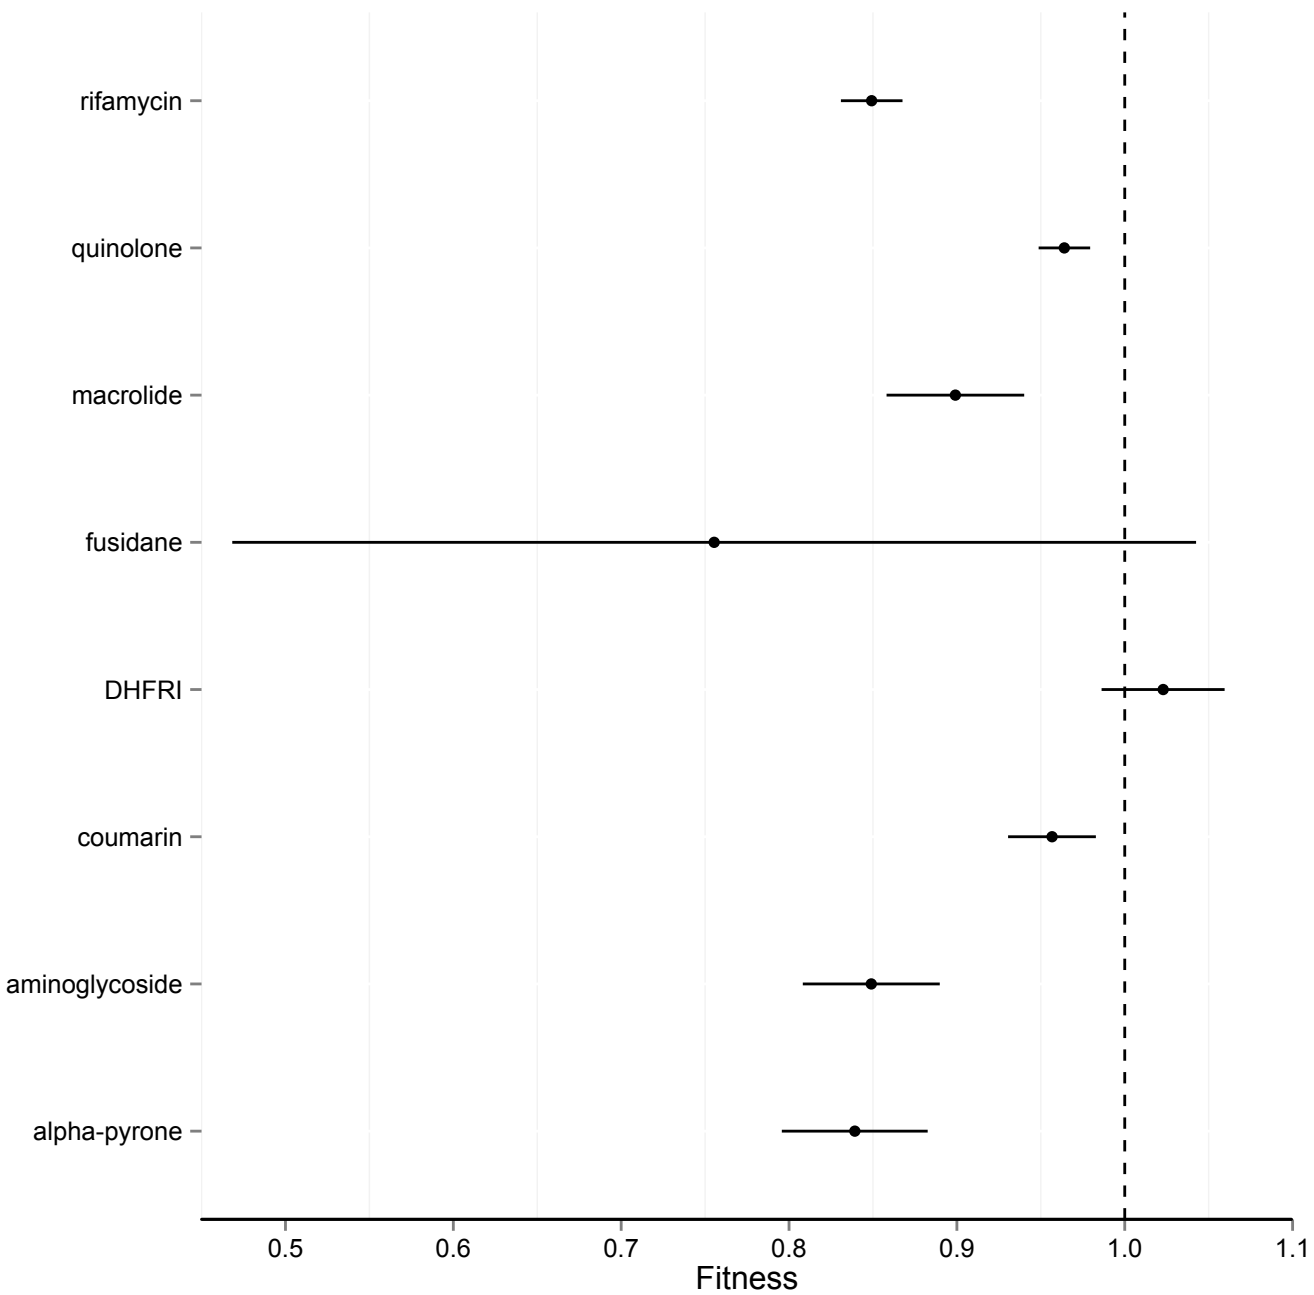

Supplement: eva0008-0273-sd2.pdf [file eva0008-0273-sd2.pdf]
